# Supplementary material for: Inhibition of amyloid fibrillation of hen egg-white lysozyme by the natural and synthetic curcuminoids
Source: Royal Society of Chemistry journal article supplement (doi:10.1039/c5ra18992f), 2016-01-01
Supplement: c5ra18992f1.pdf [file c5ra18992f1.pdf]

S1: Separation and characterization of Curcumin (CUR)

<sup>1</sup>H NMR: (d-DMSO): δ 3.82 (s, 6H, O-CH<sub>3</sub>), 6.05 (s, 1H, -CO-CH=COH-), 6.75 (d, J 15.87 Hz, 2H, Ph-CH=CH-CO-, Ph-CH=CH-COH-), 6.81 (d, J 7.93 Hz, 2H, Ph-H<sub>3</sub>, Ph-H<sub>30</sub>), 7.14 (dd, J 1.53 and 8.24 Hz, 2H, Ph-H<sub>2</sub>, Ph-H<sub>20</sub>), 7.31 (d, J 1.53 Hz, 2H, Ph-H<sub>1</sub>, Ph-H<sub>10</sub>), 7.53 (d, J 15.87 Hz, 2H, Ph-CH=CH-), 9.67 (br, 1H, exchangeable with D<sub>2</sub>O, Ph-COH<sub>2</sub>CH). TLC: stationary phase-silica gel GF254, mobile phase dichloromethane/methanol (97:3): R<sub>f</sub> of curcumin = 0.70, R<sub>f</sub> of demethoxycurcumin = 0.63 and R<sub>f</sub> of bisdemethoxycurcumin = 0.52.

S2: Synthesis and characterization of Diacetylcurcumin (DAC)

Curcumin (0.368 g, 1 mmol) was dissolved in (molecular sieve) dried pyridine (2 ml). Acetic anhydride (0.48 ml) was then added dropwise to this solution and the reaction mixture was stirred for 2 h at room temperature. Saturated sodium bicarbonate solution was added to the reaction mixture to neutralize excess acetic anhydride. The mixture was extracted with ethyl acetate (3 × 30 ml). The combined ethyl acetate layer was dried over anhydrous sodium sulfate and evaporated under reduced pressure. The resulting solid was collected and recrystallised with ethyl acetate/hexane to give diacetylcurcumin 420 mg (92.92% yield), mp = 166–167°C. IR (KBr) (cm<sup>-1</sup>): 3460 (O-H), 3039 (alkene C-H), 2940 (alkane C-H), 1762 (C=O ester), 1637 (C=O ketone), 1604-1512 (C=C), 1452 (-CH<sub>3</sub>), 1189-1123 (C-O). <sup>1</sup>H NMR (d-DMSO): δ 2.27 (s, 6H, Ph-O-CO-CH<sub>3</sub>), 3.85 (s, 6H, Ph-O-CH<sub>3</sub>), 6.20 (s, 1H, -COH=CH-CO-), 7.003 (d, J 15.89 Hz, 1H, Ph-CH=CH-COH-), 7.16 (d, J 8.07 Hz, 2H, Ph-H<sub>6</sub>), 7.33 (dd, J 1.23 and 8.24 Hz, 2H, Ph-H<sub>5</sub>), 7.52 (d, J 1.20 Hz, 2H, Ph-H<sub>3</sub>), 7.65 (d, J 16.09 Hz, 2H, Ph-CH=CH-COH-). <sup>13</sup>C NMR (d-DMSO): δ 20.57 (2C), 56.08 (2C), 81.81 (1C), 112.15 (2C), 121.60 (2C), 123.50 (2C), 124.72 (2C), 133.83 (2C), 140.03 (2C), 141.03 (2C), 151.33 (2C), 168.60 (1C), 183.37 (1C), 183.98 (2C).
